Anesthesiology  
58:200, 1983

### Modification of Macintosh Laryngoscope Blade

*To the Editor:*—In an attempt to achieve greater room for manipulation of the laryngoscope and endotracheal tube during intubation of patients with restricted space between opposing teeth and (or) a small mouth, the following parts of the Macintosh blade were remodeled: 1) The depth of the proximal part of the blade was carved 0.5–2 cm shallower and the corresponding part of the blade was made smaller in the horizontal plane. In addition, the distal end of the blade was bent slightly at the tip (fig. 1). 2) The modified blade resembles in its longitudinal axis, the Bowen-Jackson laryngoscope.<sup>1</sup> In the belief that this modification would reduce the risk of teeth-damage, the blade has been used effectively in selected patients in our department during the last three years.

MLADEN IBLER, M.D.  
*Chief Anesthetist*  
*Department of Anesthesiology*  
*Holbaek Centralsygehus*  
*4300 Denmark*

#### REFERENCE

1. Bowen RA, Jackson I: A new laryngoscope. *Anaesthesia* 7:254–256, 1952

(Accepted for publication August 3, 1982.)

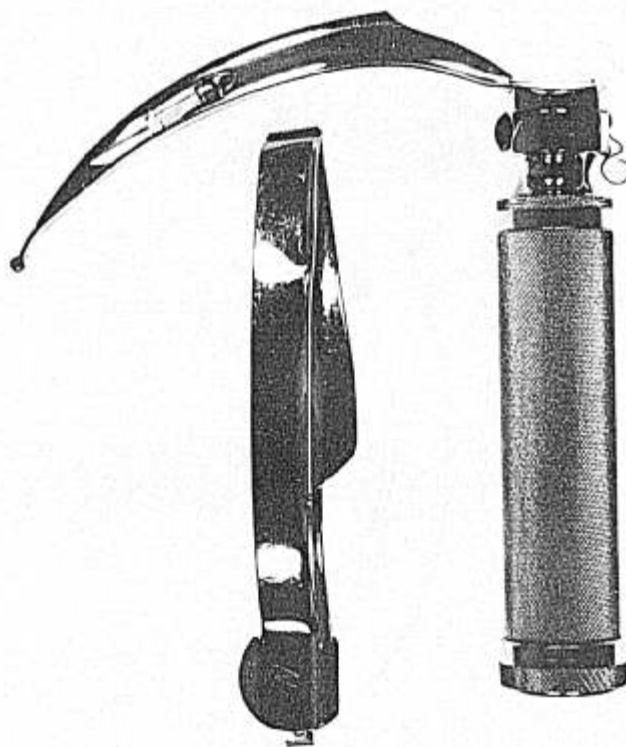

FIG. 1. Remodeled Macintosh blade.

Anesthesiology  
58:200–201, 1983

### Adapter Kit Is Available to Update APL Valves

*To the Editor:*—We would like to respond to a recently published letter which called attention to several points concerning the exhaust port on relief valves (APL).<sup>1</sup> Illustrated in the photos accompanying the letter was an Ohio Medical Products APL valve. This APL valve originally was introduced on the market having a 22-mm exhaust port. In light of the pending standards for gas scavenging, an adapter kit has been made available for changing the 22-mm exhaust port to a 19 mm/30 mm exhaust port. This adapter can be epoxied easily

onto the existing APL valve by the user. To order an adapter kit (Ohio Stock Number 216-6726-800), contact your local Ohio Medical Products dealer/sales representative. This kit is designed to be installed by hospital personnel. All APL valves currently being sold by Ohio Medical Products have the adapter installed.

We would like to make an additional comment concerning the positioning of the APL valve. Referencing the photos with the letter, under the photo labeled WRONG, the exhaust port of the APL valve is pointing
